# Supplementary material for: Phylogeography as a Proxy for Population Connectivity for Spatial Modeling of Foot-and-Mouth Disease Outbreaks in Vietnam
Source: MDPI journal article supplement (doi:10.3390/v15020388), 2023-01-29
Supplement: s1 [file s1]

**Table S1.** Results from the discrete trait analysis.

| From    | To      | Bayes factor |
|---------|---------|--------------|
| Pig     | Cattle  | 0.511        |
| Pig     | Buffalo | 0.753        |
| Cattle  | Buffalo | 77512.17     |
| Cattle  | Pig     | 77512.17     |
| Buffalo | Pig     | 3.49         |
| Buffalo | Cattle  | 2.67         |

**Table S2.** Variable selection from the univariate analysis.

| From     | To             | p value  | Chi Square | OR   |
|----------|----------------|----------|------------|------|
| Malaysia | Cambodia       | 1.45E-07 | 27.65      | inf  |
| Malaysia | Laos           | 2.20E-16 | 366.34     | inf  |
| Malaysia | china          | 1        | 0          | 1    |
| Malaysia | Thailand       | 2.20E-16 | 283.3      | inf  |
| Malaysia | Border         | 2.20E-16 | 138.71     | NA   |
| Malaysia | Slaughterhouse | 2.50E-04 | 13.36      | 0.43 |
| Cambodia | Laos           | 3.71E-13 | 52.79      | inf  |
| Cambodia | China          | 5.96E-14 | 56.38      | inf  |
| Cambodia | Thailand       | 2.20E-16 | 68.5       | inf  |
| Cambodia | Border         | 2.20E-16 | 82.3       | NA   |
| Cambodia | Slaughterhouse | 9.60E-04 | 10.9       | 0    |
| Laos     | China          | 2.20E-16 | 70.88      | 3.85 |
| Laos     | Thailand       | 3.13E-15 | 62.18      | 3.53 |
| Laos     | Border         | 2.20E-16 | 177.12     | NA   |
| Laos     | Slaughterhouse | 0.8142   | 0.05       | 0.92 |
| China    | Thailand       | 2.20E-16 | 92.96      | 0.2  |
| China    | Border         | 2.20E-16 | 76.36      | NA   |
| China    | Slaughterhouse | 1.25E-12 | 50.41      | 7.97 |
| Thailand | Border         | 2.20E-16 | 186.9      | NA   |
| Thailand | Slaughterhouse | 1.61E-09 | 3.64E+01   | 0.22 |
| Border   | Slaughterhouse | 6.56E-08 | 36.27      | NA   |

**Table S3.** Results from the univariate analysis.

| Variable | Space time DIC | Phylo time DIC |
|----------|----------------|----------------|
| Malaysia | 112610.45      | 110374.64      |
| Cambodia | 112429.72      | 110446.79      |
| Laos     | 112829.54      | 110547.01      |

|                |           |           |
|----------------|-----------|-----------|
| China          | 112640.54 | 110164.08 |
| Thailand       | 112580.43 | 110257.4  |
| Border         | 112846.95 | 110142.43 |
| Slaughterhouse | 112382.32 | 110074.45 |
| Goat           | 112758.47 | 110572.4  |
| Pig            | 112537.39 | 110521.59 |

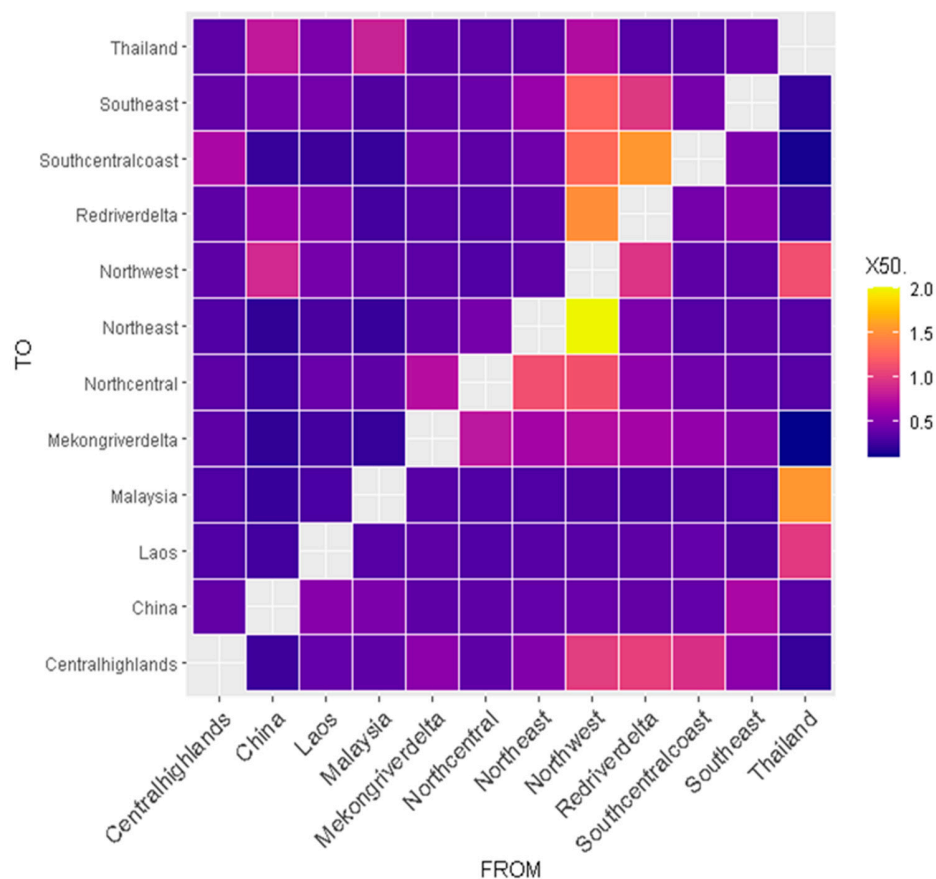

**Figure S1.** The adjusted rate matrix for Mya 98 lineage showing the virus movement between the different agricultural zones in Vietnam and the adjacent countries. The color gradient of the heat map indicates the adjusted rates, colors closer to yellow shows higher adjusted rates/higher movement compared to purple, which indicate lower adjusted rates/less movement.

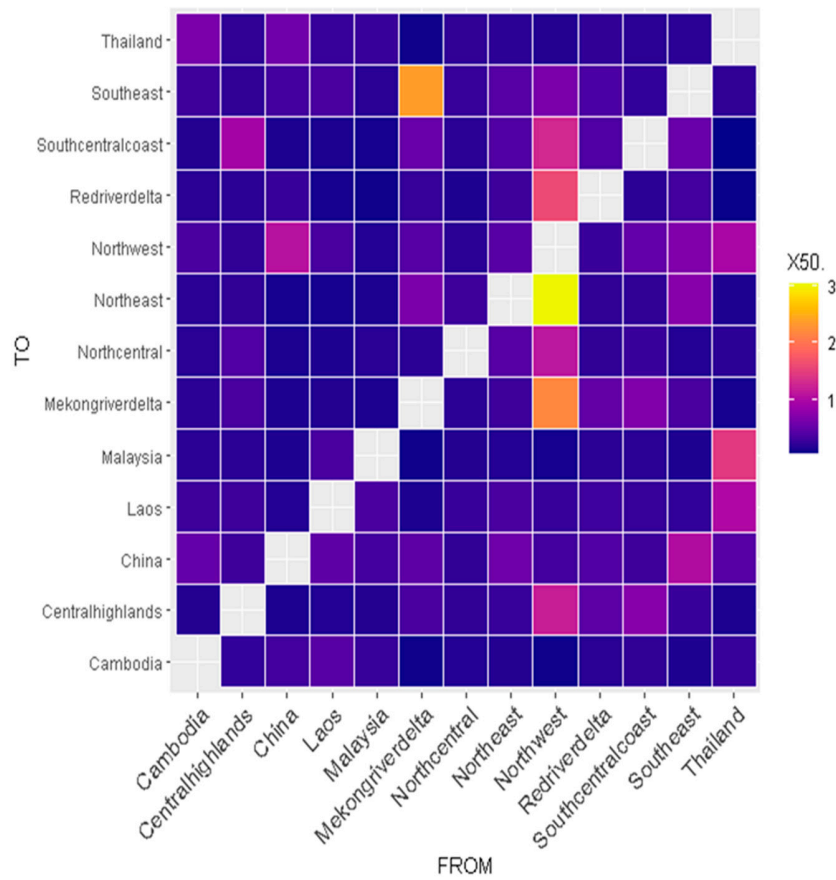

**Figure S2.** The adjusted rate matrix for total sequences showing the virus movement between the different agricultural zones in Vietnam and the adjacent countries. The color gradient of the heat map indicates the adjusted rates, colors closer to yellow shows higher adjusted rates/higher movement compared to purple, which indicate lower adjusted rates/less movement.

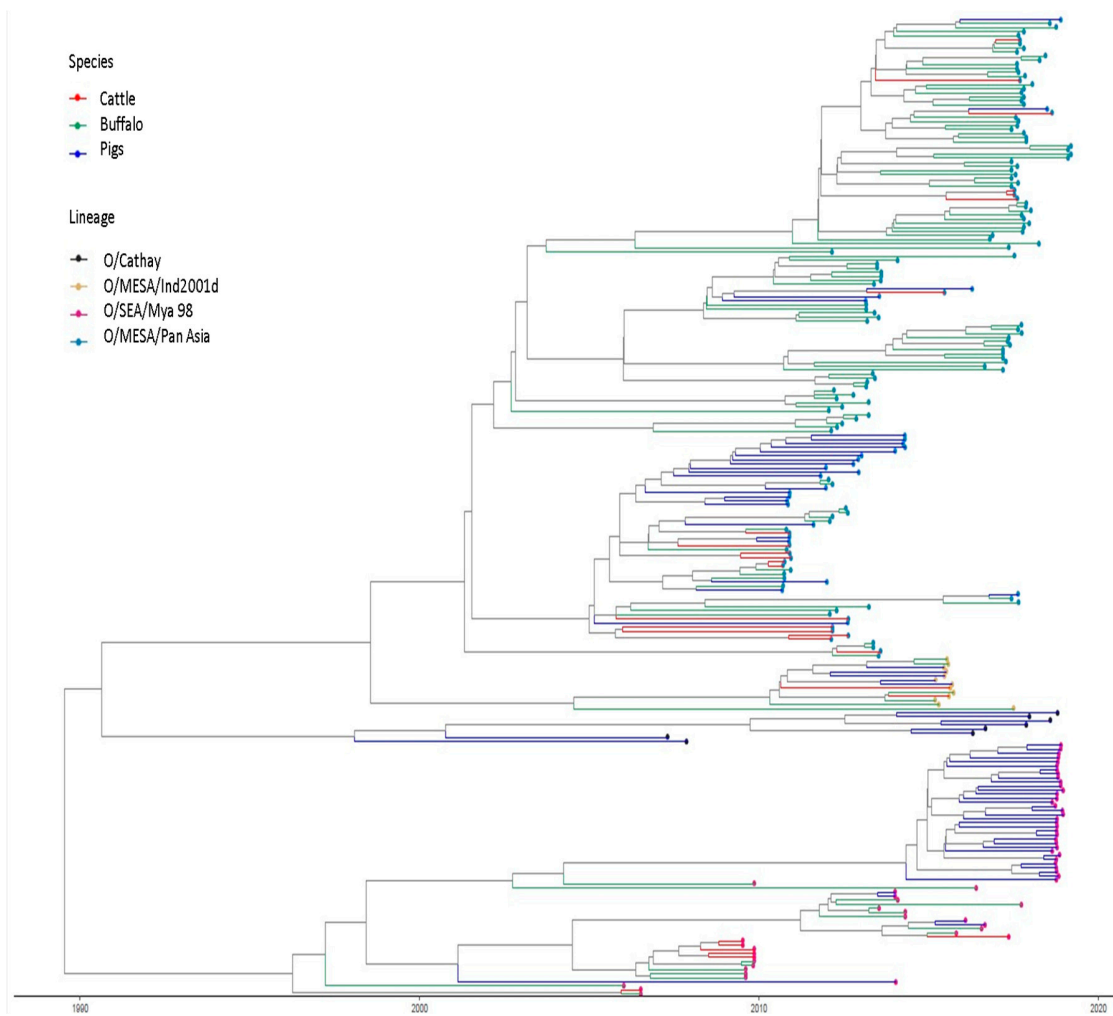

**Figure S3.** Maximum clade credibility tree for discrete trait analysis BEAST tree from the species analysis. Nodes are colored by the lineage and branches are colored with the species (cattle, buffalo, pig).

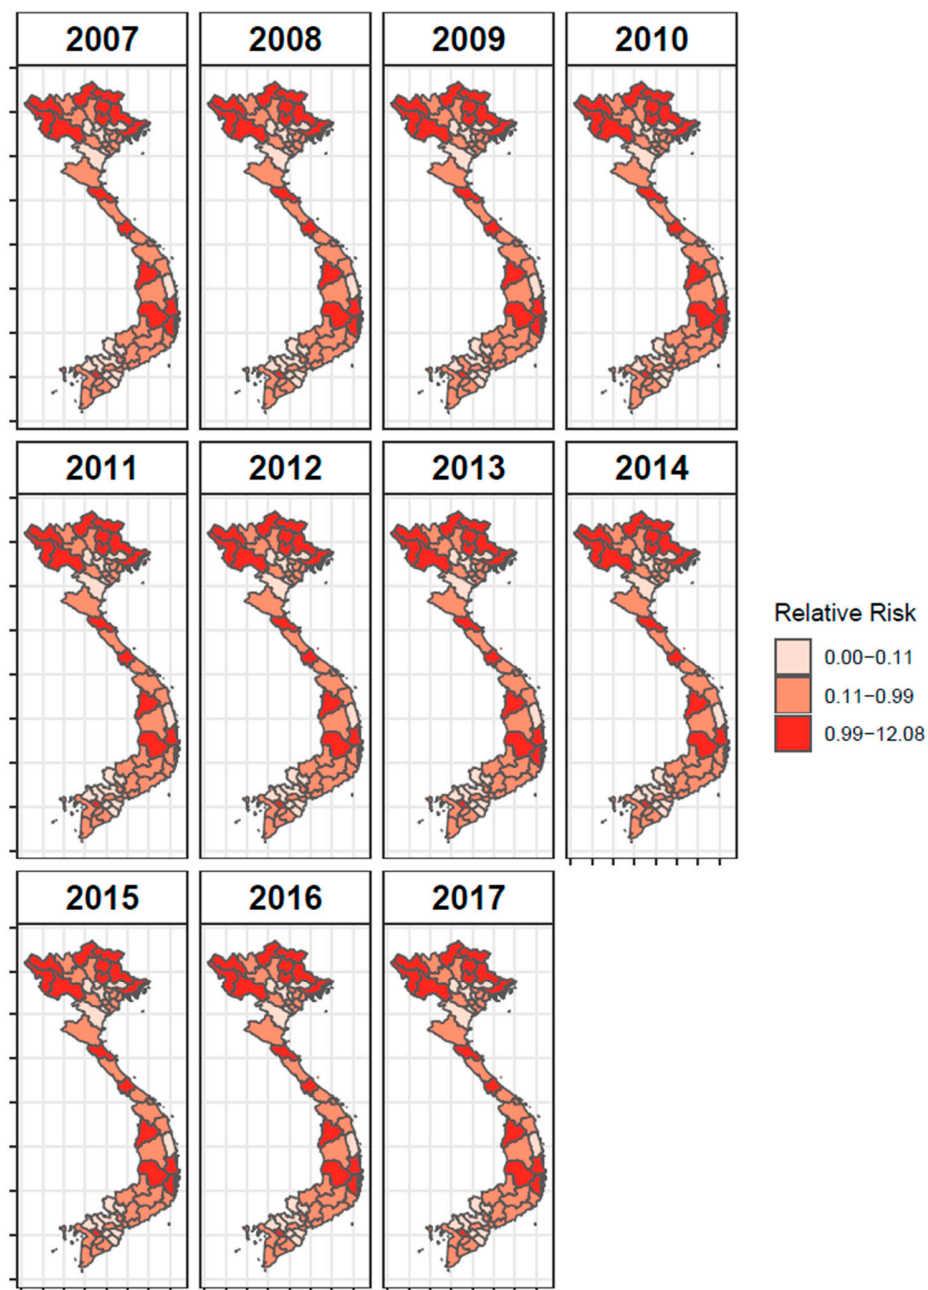

**Figure S4.** Map of fitted relative risk of outbreaks for each state from the best-fit phylo time model for years 2007-2017 in Vietnam considering the reported outbreak numbers of cattle and buffaloes. Darker areas indicate high risk provinces during the study period.

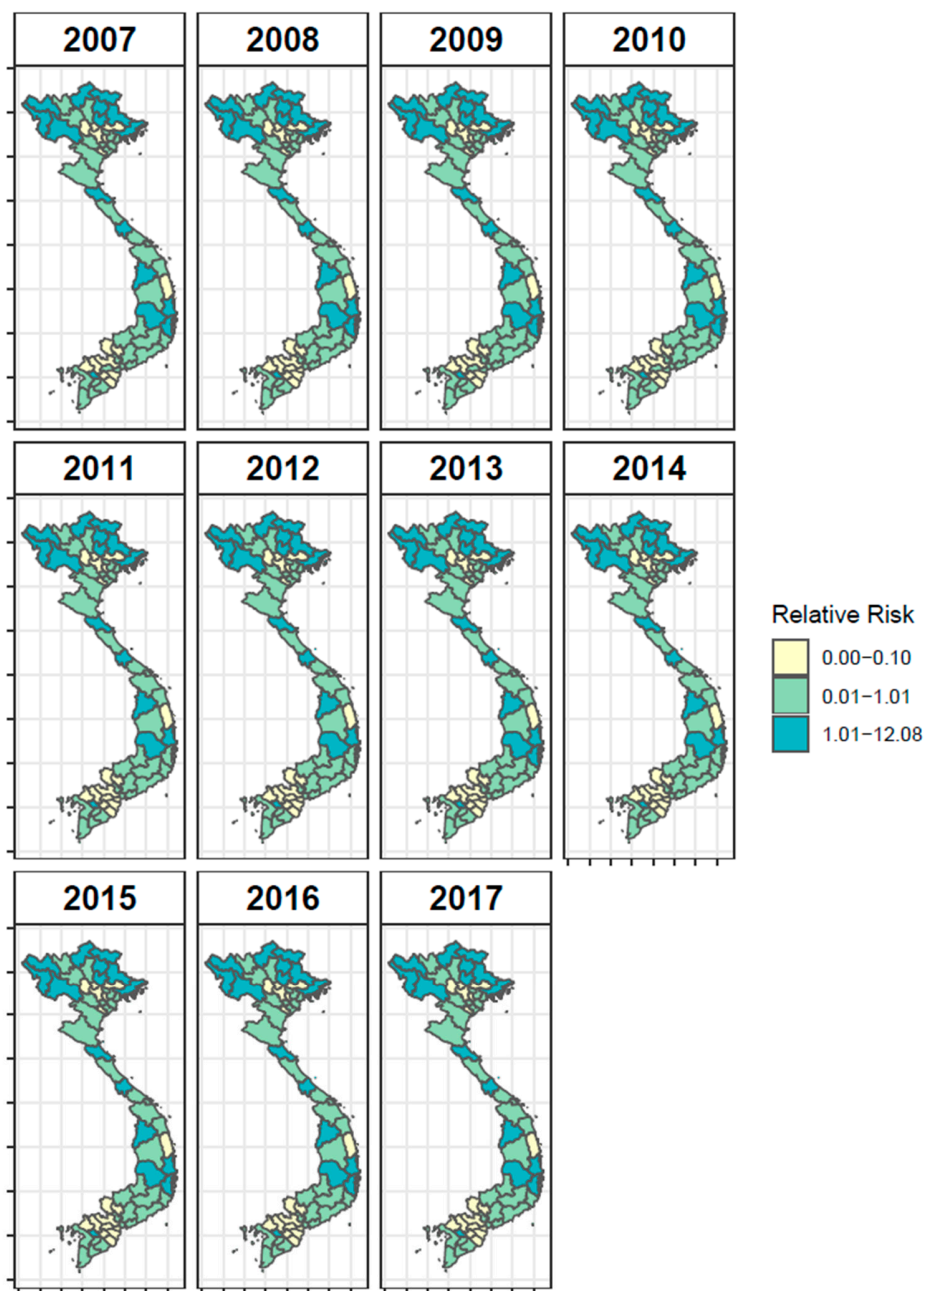

**Figure S5.** Map of fitted relative risk of outbreaks for each state from the best-fit space-time model for years 2007-2017 in Vietnam considering the reported outbreak numbers of cattle and buffaloes. Darker areas indicate high risk provinces during the study period.

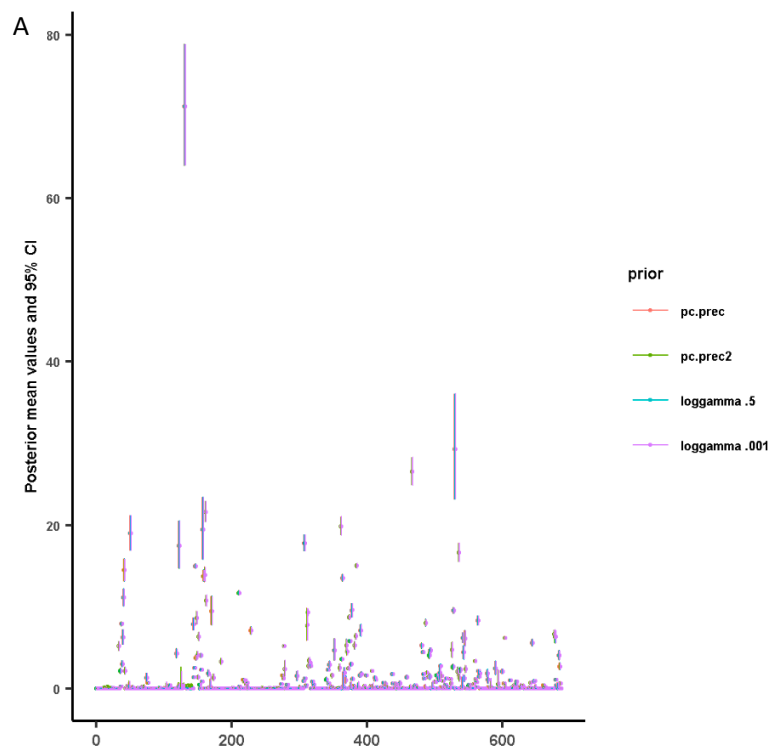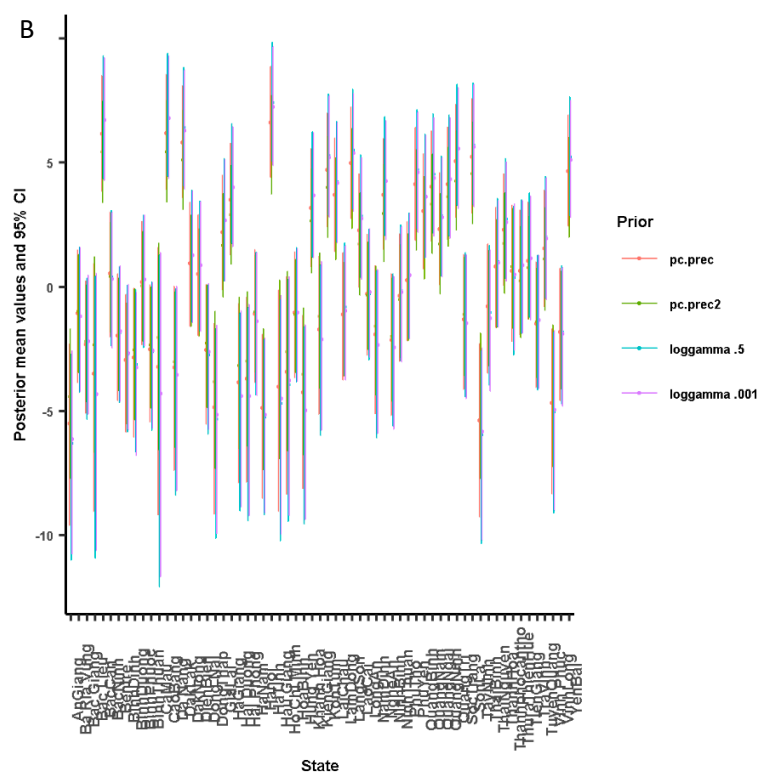

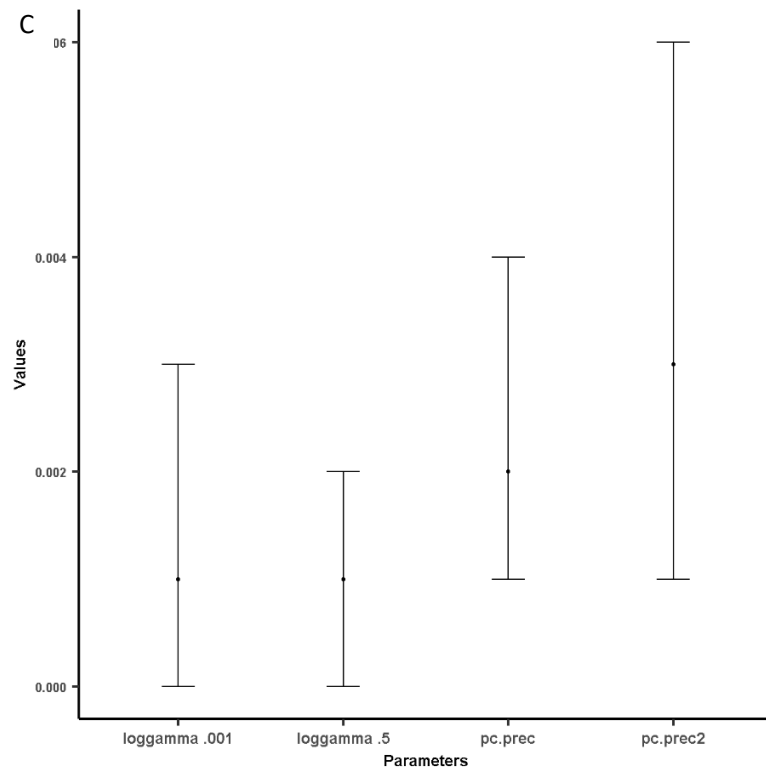

**FigureS6.** Results from the prior sensitivity analysis showing that different prior combinations produce similar results. (A) mean, (B) Random effect and (C) fixed effects.
